# Supplementary material
Source: ML conference proceedings conference paper supplement (https://openreview.net/forum?id=V7SzWKK8uv)
Supplement: supplementary_material [file attachment]

## 648 A APPENDIX

649  
650 This appendix provides the supplementary materials for this work, constructed according to the  
651 corresponding sections therein. For convenience, we here take both  $\tau_m$  and  $\tau_r$  as positive values, in  
652 order to avoid the redundance led by  $|\tau_m|$  and  $|\tau_r|$ .  
653

## 654 B PROOFS OF LEMMAS RELATIVE TO THEOREM 1

655  
656 This section provides the proofs for three Lemmas [3, 4, 5], which we used to prove Theorem 1.  
657

### 658 B.1 PROOF OF LEMMA 3

659 Recall the DEF scheme, that is,

$$660 \tau_m \frac{du(t)}{dt} = -(u(t) - u_{\text{rest}}) + \tau_r f_{\text{agg}}(\mathbf{x}(t)).$$

661  
662 For any  $t_1, t_2 \in [T]$ , we have

$$663 |u(t_1) - u(t_2)| \leq \tau_m \left| \frac{du(t_1)}{dt} - \frac{du(t_2)}{dt} \right| + \tau_r |f_{\text{agg}}(\mathbf{x}(t_1)) - f_{\text{agg}}(\mathbf{x}(t_2))|.$$

664  
665 According to the Picard-Lindelof theorem, the membrane potential  $u(t)$  in the DEF expression exists  
666 uniquely and is absolutely continuous. Let  $M_{\text{agg}}$  denote the maximum norm of the aggregation  
667 function  $f_{\text{agg}}(\cdot)$ , that is,  $|f_{\text{agg}}(\mathbf{x}(t))| \leq M_{\text{agg}}$ . Thus, one has

$$668 \left| \frac{du(t_1)}{dt} - \frac{du(t_2)}{dt} \right| \leq M_{\text{agg}} |t_1 - t_2|.$$

669  
670 According to Subsection 3, the aggregation function  $f_{\text{agg}}(\cdot)$  is linear and thus Lipschitz continuous,  
671 i.e., there exist a constant  $L_{\text{agg}}$  such that  $|f_{\text{agg}}(\mathbf{x}(t_1)) - f_{\text{agg}}(\mathbf{x}(t_2))| \leq L_{\text{agg}} |t_1 - t_2|$ . Therefore,  
672 we conclude that the membrane potential  $u(t)$  in the DEF expression is Lipschitz continuous with  
673 constant  $L_u$

$$674 |u(t_1) - u(t_2)| \leq \tau_m M_{\text{agg}} |t_1 - t_2| + \tau_r L_{\text{agg}} |t_1 - t_2| \leq L_u |t_1 - t_2|,$$

675 where  $L_u = \tau_m M_{\text{agg}} + \tau_r L_{\text{agg}}$ .

676 For any partition  $0 = t_0 < t_1 < \dots < t_n = T$ , one has

$$677 u(t_i) - u(t_{i-1}) = \frac{d}{dt}(v_i) \cdot (t_i - t_{i-1}) \quad \text{for some } v_i \in (t_{i-1}, t_i),$$

678 according to the Mean Value Theorem. By summing up the absolute differences that gives the total  
679 variation, we have

$$680 \sum_{i=1}^n |u(t_i) - u(t_{i-1})| = \sum_{i=1}^n |v_i| (t_i - t_{i-1}).$$

681 It is observed that  $u(t)$  is bounded, i.e.,  $|u(t)| \leq M_u$ . Thus, the total variation can be bounded by

$$682 V_0^T(u) \leq M_u \sum_{i=1}^n (t_i - t_{i-1}) = M_u T.$$

683 Consider the spike excitation function, we also can conclude that

$$684 |s(t_1) - s(t_2)| = |f_e(u(t_1)) - f_e(u(t_2))| \leq \frac{u(t_1) - u(t_2)}{u_{\text{firing}}}.$$

685 It is evident that both  $u(t)$  and  $s(t)$  have finite total variation due to  $M_u T < \infty$  and  $M_u T / u_{\text{firing}} < \infty$ .  
686 Therefore, the function expressed by single spiking neuron with the DEF expression is of bounded  
687 variation. Since connection weights is independent to  $t$  and bounded by  $M_w$ , we can further conclude  
688 that the function expressed by an SNN with the DEF expression is the function of bounded variation.  
689 This completes the proof.  $\square$   
690  
691  
692  
693  
694  
695  
696  
697  
698  
699  
700  
701

## B.2 PROOF OF LEMMA 4

We start this proof with the case of  $N_w = 1$ . Let  $Du$  denote the distributional derivative of the membrane potential  $u(t)$  in the DEF expression and

$$\begin{cases} \mathfrak{T} = \{u \in L^1([0, T]) \mid u(t) \text{ is a non-decreasing function w.r.t. time } t\}, \\ \mathfrak{B} = \{u \in L^1([0, T]) \mid |Du|_{(0, T)} \leq M_u\}. \end{cases}$$

From the conversion of Zhang et al. (2021), the membrane potential  $u(t)$  in the DEF expression is evidently equivalent to finding solution to the following equation if  $u(t)$  is Lipschitz continuous

$$u(t) = u(0) + \frac{1}{\tau_m} \int_0^t -(u(\tau) - u_{\text{rest}}) + \tau_r f_{\text{agg}}(\mathbf{x}(\tau)) \, d\tau.$$

By taking norms, this yields

$$\begin{aligned} \|u(t)\| &= \|u(0)\| + \frac{1}{\tau_m} \int_0^t \|u(\tau)\| + \|u_{\text{rest}} + \tau_r f_{\text{agg}}(\mathbf{x}(\tau))\| \, d\tau \\ &\leq \|u(0)\| + \frac{1}{\tau_m} \int_0^t \|u(\tau)\| \, d\tau + \frac{t}{\tau_m} \|u_{\text{rest}} + \tau_r f_{\text{agg}}(\mathbf{x}(t))\| \quad \left(\text{inserting } \int_0^t d\tau = t\right) \end{aligned}$$

According to the continuous Gronwall's inequality in Lemma 2, we have

$$\begin{aligned} \|u(t)\| &\leq \left[ \|u(0)\| + \frac{t}{\tau_m} \|u_{\text{rest}} + \tau_r f_{\text{agg}}(\mathbf{x}(t))\| \right] \exp\left(\frac{1}{\tau_m} \int_0^t d\tau\right) \\ &\leq \left[ \|u(0)\| + \frac{t}{\tau_m} \|u_{\text{rest}} + \tau_r f_{\text{agg}}(\mathbf{x}(t))\| \right] \exp\left(\frac{t}{\tau_m}\right) \end{aligned} \quad (5)$$

Provided the  $L$ -layer SNN of the following form<sup>1</sup>

$$\begin{cases} f(\mathbf{x}(t)) = f_e(u^{(L)}(t)), \\ \mathbf{s}^{(l)}(t) = f_e(u^{(l)}(t)), \\ u^{(l)}(t) \leftarrow \text{DEF} \left[ u^{(l)}(t-1), \mathbf{w}^\top \mathbf{s}^{(l-1)}(t) \right], \\ \mathbf{s}^{(0)}(t) = \mathbf{x}(t), \end{cases}$$

the norm of the expressive function can be unfolded as

$$\begin{aligned} \|f(\mathbf{x}(t))\| &= \|f_e(u^{(L)}(t)) - f_e(0)\| \leq \frac{1}{u_{\text{firing}}} \|u^{(L)}(t) - 0\| \\ &\leq \frac{1}{u_{\text{firing}}} \left[ \|u(0)\| + \frac{t}{\tau_m} \|u_{\text{rest}} + \tau_r \mathbf{w}^\top \mathbf{s}^{(l-1)}(t)\| \right] \exp\left(\frac{t}{\tau_m}\right) \quad \left(\text{inserting Eq. (5)}\right) \\ &\leq \left[ \frac{\|u(0)\|}{u_{\text{firing}}} + \frac{t \|u_{\text{rest}}\|}{\tau_m u_{\text{firing}}} \right] \exp\left(\frac{t}{\tau_m}\right) + \frac{t \tau_r}{\tau_m u_{\text{firing}}} e^{t/\tau_m} \|\mathbf{w}\| \|\mathbf{s}^{(l-1)}(t)\|. \end{aligned}$$

Next, we introduce a useful lemma relative the Gronwall's inequality (Verma & Kumar, 2025).

**Lemma 7** *Let  $(u_k)_{k \geq 0}$  be a sequence that satisfies  $u_k \leq a_k u_{k-1} + b_k$  for all  $k \geq 1$ , where  $(a_k)_{k \geq 1}, (b_k)_{k \geq 1}$  are two positive sequences. Then it holds*

$$u_k \leq \left( \prod_{j=1}^k a_j \right) u_0 + \sum_{j=1}^k b_j \left( \prod_{i=j+1}^k a_i \right) \quad \text{for all } k \geq 1.$$

According to Lemma 7, we can further bound the norm of the expressive function by

$$\|f(\mathbf{x}(t))\| \leq A^L \|\mathbf{x}(t)\| + \sum_{l=1}^L B A^{L-l-1} = A^L \|\mathbf{x}(t)\| + \frac{A^{L-1} - A^{-1}}{A - 1} B, \quad (6)$$

<sup>1</sup>Here, the superscript indicates the layer. But we omit the superscript of connection weights  $\mathbf{w}$  for simplicity.

756 where

$$757 \quad A = \frac{t \tau_r}{\tau_m u_{\text{firing}}} \exp\left(\frac{t}{\tau_m}\right) \|\mathbf{w}\| \quad \text{and} \quad B = \left[ \frac{\|u(0)\|}{u_{\text{firing}}} + \frac{t \|u_{\text{rest}}\|}{\tau_m u_{\text{firing}}} \right] \exp\left(\frac{t}{\tau_m}\right).$$

758 Here, we employ  $N_f$  to upper bound  $\|f(\mathbf{x}(t))\|$ . Provided that  $\|\mathbf{w}\| \leq M_w$  and  $\|\mathbf{x}(t)\| \leq M_x \approx 1$ ,  
759 we can intuitively force that

$$760 \quad N_f = \tilde{A}^L M_x + \frac{\tilde{A}^L - 1}{\tilde{A}(\tilde{A} - 1)} \tilde{B}$$

761 with

$$762 \quad \tilde{A} = \frac{T \tau_r}{\tau_m u_{\text{firing}}} \exp\left(\frac{T}{\tau_m}\right) M_w \quad \text{and} \quad \tilde{B} = \left[ \frac{\|u(0)\|}{u_{\text{firing}}} + \frac{T \|u_{\text{rest}}\|}{\tau_m u_{\text{firing}}} \right] \exp\left(\frac{T}{\tau_m}\right).$$

763 Therefore, we can conclude that  $N_f \in \mathcal{O}[(TM_w)^L \exp(-TL)]$ , from which

$$764 \quad \max_T N_f(T, L) \in \mathcal{O}(e^{-L}),$$

$$765 \quad N_f(T, L) \rightarrow 0 \quad \text{as} \quad T \rightarrow 0^+ \quad \text{or} \quad T \rightarrow +\infty,$$

766 and

$$767 \quad N_f(T, L) \rightarrow 0 \quad \text{as} \quad T \rightarrow +\infty \quad \text{with an exponential ratio}.$$

768 Next, we proceed to compute  $N_{\text{cn}}(\gamma, \mathcal{J}, L_2(S_n))$ . The proof line follows that of (Verma & Kumar,  
769 2025). For a fixed positive integer  $N$ , let us set the discretization size as  $\Delta x = T/N$ ,  $\Delta y = N_f/N$ .  
770 To each  $z \in \mathcal{J}$ , we associate the pair of functions  $(\psi^+[z], \psi^-[z])$  defined by

$$771 \quad \psi^+[z] = \sum_{k=0}^{N-1} \psi_k^+ \cdot \mathbf{1}[k \cdot \Delta x, (k+1) \cdot \Delta x],$$

772 where

$$773 \quad \psi_k^- = \left\lfloor \frac{z(k \cdot \Delta x + 0)}{\Delta y} \right\rfloor \quad \text{and} \quad \psi_k^+ = \left\lfloor \frac{z((k+1) \cdot \Delta x - 0)}{\Delta y} \right\rfloor + 1.$$

774 For  $\mathcal{X}^- \leq \mathcal{X}^+ \in \mathcal{J}$ , one defines  $U(\mathcal{X}^-, \mathcal{X}^+) = \{z \in \mathcal{J} \mid \mathcal{X}^- \leq z \leq \mathcal{X}^+\}$ . It is easily proved that  
775 the set  $\mathcal{U} = \{U(\mathcal{X}^-[z], \mathcal{X}^+[z]) \mid f \in \mathcal{I}\}$  is a covering of  $\mathcal{J}$  due to  $z \in U(\mathcal{X}^-[z], \mathcal{X}^+[z])$ .

776 According to

$$777 \quad \begin{aligned} \#\mathcal{U} &\leq \{0 \leq a_0 \leq a_1 \leq \dots \leq a_{N-1} \leq N \mid (a_k \in \mathbb{N})\}^2 \\ &\leq \{(p_1, \dots, p_{N+1}) \in \mathbb{N}^{N+1} \mid p_1 + \dots + p_{N+1} = N\}^2 \\ &\leq \binom{2N}{N}^2, \end{aligned}$$

778 the covering number for the class of functions in  $\mathcal{J}$  is bounded by  $\binom{2N}{N}^2$ . Consider sums of powers of  
779 binomial coefficients

$$800 \quad a_n^{(r)} = \sum_{k=0}^n \binom{n}{k}^r.$$

801 For  $r = 2$ , the closed-form solution is given by

$$802 \quad a_n^{(2)} = \binom{2n}{n}.$$

803 This implies that the central binomial coefficients  $a_n^{(2)}$  obeys the recurrence relation

$$804 \quad (n+1)a_{n+1}^{(2)} - (4n+2)a_n^{(2)} = 0.$$

By solving the aforementioned upper bound of  $\#\mathcal{U}$ , we have

$$\begin{aligned}
\binom{2N}{N} &= C_1 \frac{4^{N-1}}{\Gamma(N+1)} \left(\frac{3}{2}\right)_{2N-1} \quad (\text{here, } ((x))_N \text{ denotes the Pochhammer symbol}) \\
&= 2 \cdot \frac{2^{2(N-1)}}{\Gamma(N+1)} \left(\frac{3}{2}\right)_{2N-1} \quad (\text{let } C_1 = 2) \\
&= \frac{2^{2(N-1)}}{\Gamma(N+1)} \frac{\Gamma(\frac{3}{2} + n - 1)}{\Gamma(\frac{3}{2})} = \frac{2^{2(N-1)}}{\Gamma(N+1)} \Gamma\left(N + \frac{1}{2}\right) \frac{\sqrt{\pi}}{2} \\
&= \frac{2^{2N} \Gamma(N + \frac{1}{2})}{\sqrt{\pi} \Gamma(N+1)} \\
&\leq \frac{2^{2N}}{\sqrt{\pi}} \frac{1}{\sqrt{N}} \quad (\text{from the ratio of gamma functions (Gautschi, 1959)}) \\
&= \frac{2^{2N}}{\sqrt{\pi N}}.
\end{aligned}$$

Hence, we can conclude that

$$\left(\frac{2N}{N}\right)^2 \leq \frac{2^{4N}}{\pi N} \leq \frac{2^{4N}}{6\pi},$$

where the second inequality holds from  $N \geq 6$ . Let  $N = \lceil (TN - f)/\gamma \rceil + 1$ , then

$$N_{\text{cn}}(\gamma, \mathfrak{J}, L_2(S_n)) \leq \frac{2^{4(TN-f)/\gamma}}{6\pi}.$$

From the bound proposed by Dutta & Nguyen (2018), that is,

$$N_{\text{cn}}(\gamma, \mathfrak{B}, L^2(S_n)) \leq N_{\text{cn}}^2(\gamma/2, \mathfrak{J}, L^2(S_n)),$$

a stricter bound is proved by

$$N_{\text{cn}}(\gamma, \mathfrak{B}, L_2(S_n)) \leq \frac{2^{16(TN-f)/\gamma}}{(6\pi)^2}.$$

The above computations can be easily extended to the case of  $N_w \geq 1$  where all variables are still bounded by vector or matrix norms. For  $u(t) \in \mathbb{R}^{N_w}$ , we have

$$\begin{cases} N_{\text{cn}}(\gamma, \mathfrak{J}_{N_w}, L_2(S_n)) \leq \left[ \frac{2^{4(TN-f)\sqrt{N_w}/\gamma}}{6\pi} \right]^{N_w}, \\ N_{\text{cn}}(\gamma, \mathfrak{B}_{N_w}, L_2(S_n)) \leq \left[ \frac{2^{16(TN-f)\sqrt{N_w}/\gamma}}{(6\pi)^2} \right]^{N_w}. \end{cases}$$

This completes the proof.  $\square$

## C PROOFS AND USEFUL LEMMAS OF THEOREM 2

This section provides the proofs for Theorem 2. The results of other LIF expressions follows closely the proof of Theorem 1. Hence, we here only show the computational difference led by the SRM and DTA expressions. We begin the proof by taking the SRM expression as an example.

**Lemma 8** *In the case of finite spikes in  $[0, T]$ , the function expressed by an SNN with the SRM scheme is the function of bounded variation.*

*Proof.* Recall the SRM scheme, that is,

$$u(t) = \sum_{f: t^f \leq t} \eta(t - t^f) + \sum_j w_j \sum_{e: t_e^e \leq t} \epsilon(t - t_j^e).$$

864 According to Subsection 3, the kernels  $\eta(\cdot)$  and  $\epsilon(\cdot)$  are Lipschitz continuous, i.e., there exist constants  
865  $L_\eta$  and  $L_\epsilon$  such that

$$866 \quad |\eta(t_1) - \eta(t_2)| \leq L_\eta |t_1 - t_2| \quad \text{and} \quad |\epsilon(t_1) - \epsilon(t_2)| \leq L_\epsilon |t_1 - t_2| .$$

868 For any  $t_1, t_2 \in [T]$ , we have

$$869 \quad |u(t_1) - u(t_2)| \leq \sum_{f: t^f < t} |\eta(t_1 - t^f) - \eta(t_2 - t^f)| + \sum_j \sum_{e: t_j^e < t} |\epsilon(t_1 - t_j^e) - \epsilon(t_2 - t_j^e)| .$$

872 Consider a finite number of spikes  $N_f$  and  $N_e$ , the above inequality can be written by

$$874 \quad |u(t_1) - u(t_2)| \leq N_f L_\eta |t_1 - t_2| + N_e L_\epsilon |t_1 - t_2| = L_u |t_1 - t_2| ,$$

875 where  $L = N_f L_\eta + N_e L_\epsilon$ . Thus, we can conclude that the SRM function is Lipschitz continuous.

877 For any partition  $0 = t_0 < t_1 < \dots < t_n = T$ , one has

$$878 \quad u(t_i) - u(t_{i-1}) = \frac{d}{dt}(v_i) \cdot (t_i - t_{i-1}) \quad \text{for some } v_i \in (t_{i-1}, t_i) ,$$

881 according to the Mean Value Theorem. By summing up the absolute differences that gives the total  
882 variation, we have

$$883 \quad \sum_{i=1}^n |u(t_i) - u(t_{i-1})| = \sum_{i=1}^n |v_i| (t_i - t_{i-1}) .$$

885 It is observed that  $u(t)$  is bounded, i.e.,  $|u(t)| \leq M_u$ . Thus, the total variation can be bounded by

$$887 \quad V_0^T(u) \leq M_u \sum_{i=1}^n (t_i - t_{i-1}) = M_u T .$$

890 Consider the spike excitation function, we also can conclude that

$$891 \quad |s(t_1) - s(t_2)| = |f_e(u(t_1)) - f_e(u(t_2))| \leq \frac{u(t_1) - u(t_2)}{u_{\text{firing}}} .$$

894 It is evident that both  $u(t)$  and  $s(t)$  have finite total variation due to  $M_u T < \infty$  and  $M_u T / u_{\text{firing}} < \infty$ .  
895 Therefore, the function expressed by single spiking neuron with the SRM scheme is of bounded  
896 variation. Since connection weights is independent to  $t$  and bounded by  $M_w$ , we can further conclude  
897 that the function expressed by an SNN with the DEF scheme is the function of bounded variation.  
898 This completes the proof.  $\square$

864  
865  
866  
867  
868  
869  
870  
871  
872  
873  
874  
875  
876  
877  
878  
879  
880  
881  
882  
883  
884  
885  
886  
887  
888  
889  
890  
891  
892  
893  
894  
895  
896  
897  
898  
899  
900  
901  
902  
903  
904  
905  
906  
907  
908  
909  
910  
911  
912  
913  
914  
915  
916  
917
